# Supplementary material for: High Seroprevalence of Dengue Virus Infection in Sudan: Systematic Review and Meta-Analysis
Source: Trop Med Infect Dis. 2020 Jul 18;5(3):120. doi: 10.3390/tropicalmed5030120 (PMC7559303; doi:10.3390/tropicalmed5030120)
Supplement: Supplementary file 1 [file tropicalmed-05-00120-s001.pdf]

**Supplementary Materials:**

**Table S1:** Heterogeneity Test for the general analysis of all included dengue reports.

| Statistical Test                                      | Results | Degree of Freedom | Significant (P value) |
|-------------------------------------------------------|---------|-------------------|-----------------------|
| Heterogeneity $\chi^2$                                | 3315.42 | 18                | 0.00                  |
| $I^2$ (variation in ES attributable to heterogeneity) | 99.46%  | -                 | -                     |
| Estimate of between-study variance $\tau^2$           | 0.03    |                   |                       |
| Test of ES                                            | 0       |                   |                       |
| Z                                                     | 6.57    |                   | 0.00                  |

**Table S2:** Heterogeneity Tests for the sub-group analysis by study type.

| Heterogeneity degrees                     | Results | Degree of Freedom | Significant (P value) | I <sup>2</sup> ** |
|-------------------------------------------|---------|-------------------|-----------------------|-------------------|
|                                           |         |                   |                       |                   |
| Cross-sectional hospital-based            | 895.72  | 12                | 0.00                  | 98.66%            |
| Cross-sectional community-based           | 852.23  | 4                 | 0.00                  | 99.53%            |
| Retrospective Cohort                      | 0       | -                 | -                     | -                 |
| Overall                                   | 3315.42 | 18                | 0.00                  | 99.46%            |
| Test for heterogeneity between sub-groups | 30.49   | 2                 | 0.00                  | -                 |

\*\* I<sup>2</sup>: the variation in ES attributable to heterogeneity)

**Table S3:** Significance tests of Estimates for the sub-group analysis by study type.

| Significance test               | Z    | Significant (P value) |
|---------------------------------|------|-----------------------|
| Cross-sectional hospital-based  | 4.80 | 0.00                  |
| Cross-sectional community-based | 3.01 | 0.00                  |
| Retrospective Cohort            | 8.86 | 0.00                  |
| Overall                         | 6.57 | 0.00                  |

**Table S4:** Heterogeneity Tests for the sub-group analysis according to diagnostic test.

| Heterogeneity degrees                     | Results | Degree of Freedom | Significant (P value) | I <sup>2</sup> ** |
|-------------------------------------------|---------|-------------------|-----------------------|-------------------|
| IgM                                       | 2126.24 | 12                | 0.00                  | 99.44%            |
| IgG                                       | 173.30  | 5                 | 0.00                  | 97.11%            |
| Overall                                   | 3315.42 | 17                | 0.00                  | 99.46%            |
| Test for heterogeneity between sub-groups | 4.24    | 1                 | 0.04                  | -                 |

\*\* I<sup>2</sup>: the variation in ES attributable to heterogeneity)

**Table S5:** Significance tests of Estimates for the sub-group analysis according to diagnostic test..

| Significance test | Z    | Significant (P value) |
|-------------------|------|-----------------------|
| IgM               | 5.01 | 0.00                  |
| IgG               | 5.95 | 0.00                  |
| Overall           | 6.57 | 0.00                  |

**Table S6:** Heterogeneity Tests for the sub-group analysis according to Study location.

| Heterogeneity degrees                     | Results | Degree of Freedom | Significant (P value) | I <sup>2</sup> ** |
|-------------------------------------------|---------|-------------------|-----------------------|-------------------|
| East                                      | 1943.23 | 12                | 0.00                  | 99.38%            |
| North                                     | -       | 0                 | -                     |                   |
| Central                                   | -       | 1                 | -                     |                   |
| West                                      | -       | 2                 | -                     |                   |
| Overall                                   | 3315.42 | 18                | 0.00                  | 99.46%            |
| Test for heterogeneity between sub-groups | 46.00   | 3                 | 0.00                  | -                 |

\*\* I<sup>2</sup>: the variation in ES attributable to heterogeneity)

**Table S7:** Significance tests of Estimates for the sub-group analysis according to Study location.

| Significance test | Z     | Significant (P value) |
|-------------------|-------|-----------------------|
| East              | 5.22  | 0.00                  |
| North             | 7.60  | 0.00                  |
| Central           | 31.83 | 0.00                  |
| West              | 3.83  | 0.00                  |
| Overall           | 6.57  | 0.00                  |
